# Supplementary material for: Future dust concentration over the Middle East and North Africa region under global warming and stratospheric aerosol intervention scenarios
Source: Copernicus journal article supplement (doi:10.5194/acp-23-10677-2023), 2023-09-26
Supplement: Supplementary file 1 [file acp-23-10677-2023-supplement.pdf]

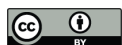

*Supplement of*

## **Future dust concentration over the Middle East and North Africa region under global warming and stratospheric aerosol intervention scenarios**

**Seyed Vahid Mousavi et al.**

*Correspondence to:* Seyed Vahid Mousavi (v.mousavi33@email.com)

The copyright of individual parts of the supplement might differ from the article licence.

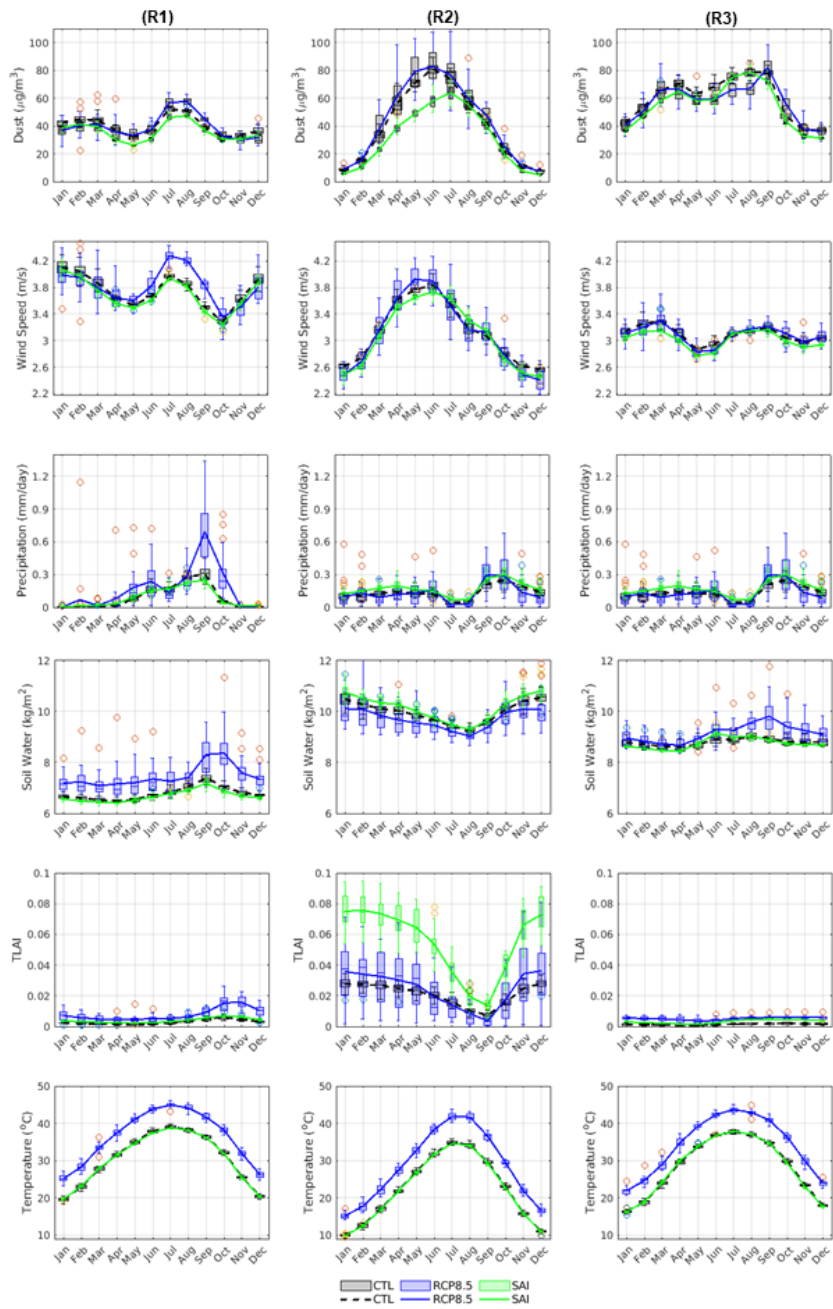

**Figure S1:** The multi monthly mean values of the considered parameters with percentile values as error bars for R1, R2 and R3 dust hotspots, for different scenarios. The box plots are depicted with the median (horizontal line), the 25–75 percentile (box), the 5–95 percentile (horizontal line), and outlier data (circle).
